# Supplementary material for: Comparative neurofilament light chain trajectories in CSF and plasma in autosomal dominant Alzheimer’s disease
Source: Springer Nature journal article supplement (doi:10.1038/s41467-024-52937-8), 2024-11-18
Supplement: MOESM1 [file 41467_2024_52937_MOESM1_ESM.pdf]

## Supplementary Tables and Figures

**Supplementary Table 1. Background characteristics of longitudinal sample.**

| Variable                                 | NC, N = 88 <sup>1</sup> | MC, N = 146 <sup>1</sup> | p-value <sup>2</sup> |
|------------------------------------------|-------------------------|--------------------------|----------------------|
| <b>Baseline age (yrs)</b>                | 38.5 (10.8)             | 41.7 (10.5)              | 0.048                |
| <b>Sex</b>                               |                         |                          | 0.842                |
| Female                                   | 50 (57%)                | 81 (55%)                 |                      |
| Male                                     | 38 (43%)                | 65 (45%)                 |                      |
| <b>EYO (yrs)</b>                         | -9.1 (10.6)             | -5.0 (10.4)              | 0.004                |
| <b>Baseline BMI</b>                      | 28.0 (6.2)              | 27.5 (6.1)               | 0.459                |
| <b>Baseline MMSE</b>                     | 30.1 (7.3)              | 25.2 (6.7)               | 9.98e-09             |
| <b>Family Mutation</b>                   |                         |                          | 0.611                |
| APP                                      | 14 (16%)                | 27 (18%)                 |                      |
| PSEN1                                    | 65 (74%)                | 109 (75%)                |                      |
| PSEN2                                    | 9 (10%)                 | 10 (6.8%)                |                      |
| <b>Baseline precuneus volume (mm3)</b>   | 9,493.7 (1,085.4)       | 8,828.7 (1,722.0)        | 0.003                |
| <b>Baseline precuneus PiB-PET (SUVR)</b> | 1.2 (0.4)               | 2.9 (1.4)                | 2.019e-16            |
| <b>Baseline plasma NfL (pg/ml)</b>       | 5.5 (2.5)               | 11.8 (10.9)              | 5.678e-11            |
| <b>Baseline CSF NfL (pg/ml)</b>          | 239.3 (144.3)           | 645.0 (631.3)            | 2.472e-10            |
| <b>Baseline CDR Global</b>               |                         |                          | 2.951e-12            |
| CDR 0                                    | 88 (100%)               | 82 (56%)                 |                      |
| CDR 0.5                                  | 0 (0%)                  | 29 (20%)                 |                      |
| CDR 1+                                   | 0 (0%)                  | 35 (24%)                 |                      |

<sup>1</sup>Mean (SD); n (%)

<sup>2</sup>Wilcoxon rank sum test (two-sided); Pearson's Chi-squared test (two-sided)

MC = Mutation carrier; NC = Non-carrier family member; EYO = estimated years from symptom onset; MMSE = Mini Mental Status Examination; BMI = Body mass index; CDR = Clinical Dementia Rating. The overall N is 88 for NC group and 146 for MC, except for precuneus volume (NC = 78 and MC = 127) and precuneus PiB-PET (NC = 61 and MC = 94). Note that not all parameters could be collected from each participant. Sex was self-reported as male or female.

**Supplementary Table 2. Full models examining background characteristics and baseline log<sub>10</sub>NfL.**

| Mutation group   | Variable | Baseline log <sub>10</sub> Plasma NfL |          | Baseline log <sub>10</sub> CSF NfL |          |
|------------------|----------|---------------------------------------|----------|------------------------------------|----------|
|                  |          | B (SE)                                | p-value  | B (SE)                             | p-value  |
| Non-Carrier      | Age      | 0.012 (0.001)                         | 1.72e-16 | 0.017 (0.001)                      | 8.40e-27 |
|                  | BMI      | -0.010 (0.002)                        | 7.17e-5  | -0.003 (0.003)                     | 0.247    |
|                  | Sex      | -0.014 (0.027)                        | 0.606    | 0.085 (0.028)                      | 0.003    |
| Mutation Carrier | Age      | 0.016 (0.001)                         | 7.43e-32 | 0.021 (0.002)                      | 8.18e-33 |
|                  | BMI      | -0.008 (0.002)                        | 4.66e-04 | -0.002 (0.003)                     | 0.582    |
|                  | Sex      | -0.023 (0.025)                        | 0.365    | 0.088 (0.033)                      | 0.008    |

Unstandardized beta estimates, standard error (SE), and corresponding p-values from linear regression models examining association of age, body mass index (BMI), and sex on cross-sectional cerebrospinal fluid (CSF) and plasma neurofilament light chain (NfL) in mutation carriers and non-carriers. Self-reported female sex is the reference group.

**Supplementary Table 3. Covariate-adjusted association between log<sub>10</sub>plasma and log<sub>10</sub>CSF NfL.**

| Mutation group   | Variable                           | Baseline log <sub>10</sub> Plasma NfL |          | Δ log <sub>10</sub> Plasma NfL |          |
|------------------|------------------------------------|---------------------------------------|----------|--------------------------------|----------|
|                  |                                    | B (SE)                                | p-value  | B (SE)                         | p-value  |
| Non-Carrier      | Baseline Age                       | 0.007 (0.002)                         | 1.67e-04 | 0.0001 (<0.001)                | 0.035    |
|                  | Baseline BMI                       | -0.009 (0.002)                        | 1.53e-04 | -0.0004 (<0.001)               | 7.24e-05 |
|                  | Sex                                | -0.038 (0.026)                        | 0.148    | -0.002 (0.001)                 | 0.091    |
|                  | Baseline log <sub>10</sub> CSF NfL | 0.288 (0.073)                         | 1.19e-04 | NA                             | NA       |
|                  | Δlog <sub>10</sub> CSF NfL         | NA                                    | NA       | 0.375 (0.091)                  | 9.45e-05 |
| Mutation Carrier | Baseline Age                       | 0.003 (0.001)                         | 7.05e-04 | 0.0002 (<0.001)                | 0.007    |
|                  | Baseline BMI                       | -0.007 (0.001)                        | 1.63e-06 | -0.0004 (<0.001)               | 7.64e-05 |
|                  | Sex                                | -0.076 (0.016)                        | 5.84e-06 | -0.004 (0.001)                 | 3.48e-04 |
|                  | Baseline log <sub>10</sub> CSF NfL | 0.596 (0.030)                         | 3.72e-55 | NA                             | NA       |
|                  | Δlog <sub>10</sub> CSF NfL         | NA                                    | NA       | 0.067 (0.055)                  | 4.57e-24 |

Unstandardized beta estimates, standard error (SE), and corresponding p-values from linear regression and linear mixed effects models comparing cross-sectional and longitudinal cerebrospinal fluid (CSF) and plasma neurofilament light chain (NfL) in mutation carriers and non-carriers, adjusting for age, body mass index (BMI), and sex. Self-reported female sex is the reference group.

**Supplementary Table 4. Association between rate of change in NfL and AD clinical groupings.**

| Comparison                                              | B       | SE    | p-value    |
|---------------------------------------------------------|---------|-------|------------|
| <b><math>\Delta \log_{10}(\text{plasma NfL})</math></b> |         |       |            |
| Presym vs. NC                                           | 0.004   | 0.002 | 0.038      |
| Conv vs. NC                                             | 0.017   | 0.003 | 1.28e-05   |
| Sym vs. NC                                              | 0.020   | 0.002 | < 1.00e-90 |
| Conv vs. Presym                                         | 0.012   | 0.003 | 0.001      |
| Sym vs. Presym                                          | 0.015   | 0.002 | 1.62e-11   |
| Sym vs. Conv                                            | 0.003   | 0.003 | 0.772      |
| <b><math>\Delta \log_{10}(\text{CSF NfL})</math></b>    |         |       |            |
| Presym vs. NC                                           | 0.002   | 0.001 | 0.096      |
| Conv vs. NC                                             | 0.012   | 0.002 | 9.33e-08   |
| Sym vs. NC                                              | 0.019   | 0.001 | < 1.00e-90 |
| Conv vs. Presym                                         | 0.010   | 0.002 | 3.65e-05   |
| Sym vs. Presym                                          | 0.017   | 0.001 | < 1.00e-90 |
| Sym vs. Conv                                            | 0.007   | 0.002 | 0.006      |
| <b>Plasma/CSF NfL</b>                                   |         |       |            |
| Presym vs. NC                                           | - 0.002 | 0.001 | 0.802      |
| Conv vs. NC                                             | - 0.004 | 0.003 | 0.509      |
| Sym vs. NC                                              | - 0.010 | 0.002 | 8.39e-10   |
| Conv vs. Presym                                         | - 0.003 | 0.003 | 0.753      |
| Sym vs. Presym                                          | - 0.009 | 0.002 | 6.45e-08   |
| Sym vs. Conv                                            | - 0.006 | 0.003 | 0.205      |

Unstandardized beta estimates, standard error, and corresponding p-values from linear regression and linear mixed models examining association between mutation/cognitive groupings and rate of change in NfL. Presym = Presymptomatic Mutation Carrier (MC) group; NC = Non-carrier group; Conv = Converter MC group; Sym = Symptomatic MC group.

**Supplementary Table 5. Longitudinal association between NfL and AD biomarkers.**

| Cognitive Group | $\Delta \log_{10}$ Plasma NfL |       |                           |          | $\Delta \log_{10}$ CSF NfL |       |                           |          |
|-----------------|-------------------------------|-------|---------------------------|----------|----------------------------|-------|---------------------------|----------|
|                 | $\Delta$ Amyloid - PET        |       | $\Delta$ Precuneus Volume |          | $\Delta$ Amyloid - PET     |       | $\Delta$ Precuneus Volume |          |
|                 | B(SE)                         | p     | B(SE)                     | p        | B(SE)                      | p     | B(SE)                     | p        |
| <b>NC</b>       | -0.048<br>(0.4)               | 0.912 | 265<br>(873)              | 0.752    | -0.737<br>(1.3)            | 0.568 | -884<br>(2,630)           | 0.740    |
| <b>PreSym</b>   | 1.916<br>(1.2)                | 0.127 | -1,154<br>(1,105)         | 0.302    | 0.130<br>(3.6)             | 0.971 | -1,143<br>(2,618)         | 0.667    |
| <b>Sym</b>      | 0.617<br>(1.4)                | 0.672 | -7,193<br>(1,947)         | 8.73e-04 | 1.003<br>(0.003)           | 0.871 | -23,658<br>(5,537)        | 1.20e-04 |

Unstandardized beta estimates (B), standard errors (SE), and multiple comparison corrected exact p-values (p) for  $\Delta \log_{10}$  NfL\*time term from linear mixed effects models adjusted for baseline age\*time, baseline BMI\*time, and sex\*time. Presym = Presymptomatic Mutation Carrier (MC) group; NC = Non-carrier group; Conv = Converter MC group; Sym = Symptomatic MC group.

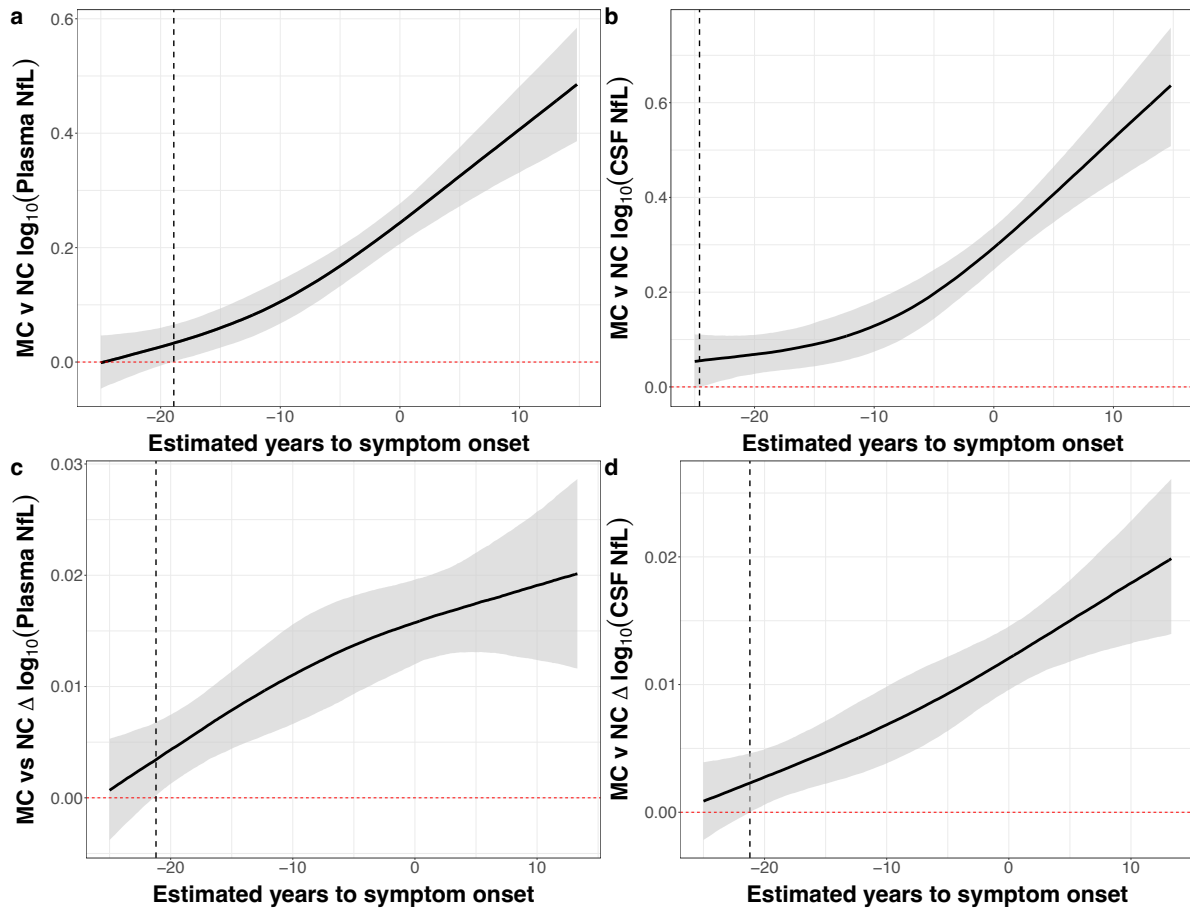

**Supplementary Fig. 1: Difference distribution curves for cross-sectional and longitudinal plasma and CSF NfL levels in mutation carriers and non-carriers.** Difference of posterior distribution for cross-sectional (a) plasma and (b) CSF  $\log_{10}(\text{NfL})$  and longitudinal (c) plasma and (d) CSF  $\log_{10}(\text{NfL})$  between mutation carriers (MC) and non-carriers (NC), as a function of Estimated years of onset (EYO). The solid black line depicts the median of the difference distribution and the shaded area represents the 95% equal-tailed credible intervals. EYO was considered statistically significant if the 95% equal-tailed credible intervals of the posterior distribution did not overlap 0. This EYO where MC and NC groups first diverge is represented by a vertical dashed line.

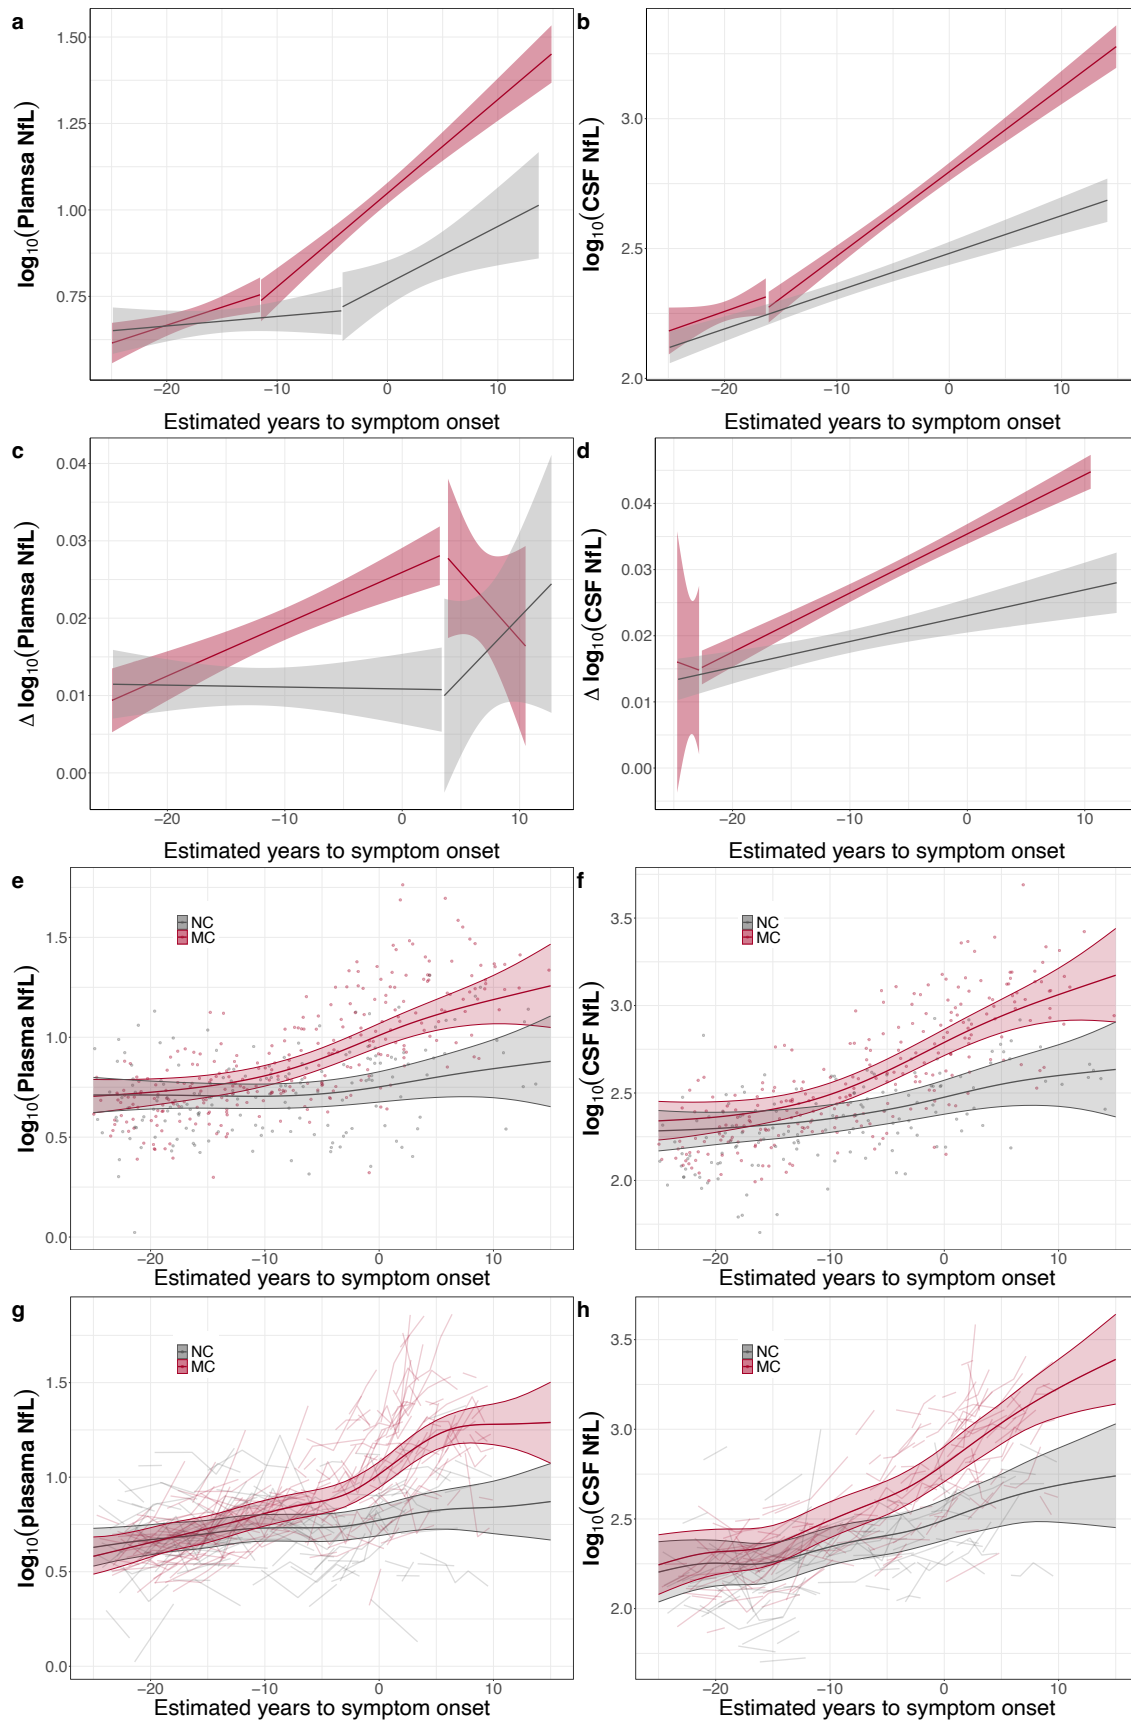

**Supplementary Fig. 2: Piecewise regression analyses for cross-sectional and longitudinal plasma and CSF NfL levels in mutation carriers and non-carriers.** A piecewise regression analysis was performed for baseline (a) plasma and (b) CSF  $\log_{10}(\text{NfL})$  and longitudinal rate of change in (c) plasma and (d) CSF  $\log_{10}(\text{NfL})$  as a function of EYO in mutation carriers (MC, red line) and non-carriers (NC, grey line). Bifurcation point was determined with the segmented package in R. Individual points showing cross-sectional (e,f) and spaghetti plots showing longitudinal (g,h) plasma and CSF  $\log_{10}(\text{NfL})$  for NC (grey) and MC (red). Spaghetti plots are restricted to EYOs between -20 and +10. The curves are generated from spline-based confidence intervals from fitted generalised additive models (GAMs).
